# Supplementary material for: A novel flower-like hierarchical aluminum-based MOF anode for high-performance lithium-ion batteries
Source: Royal Society of Chemistry journal article supplement (doi:10.1039/d2ce00786j), 2022-01-01
Supplement: d2ce00786j1.pdf [file d2ce00786j1.pdf]

# **A novel flower-like hierarchical aluminum-based MOF anode for high-performance lithium-ion batteries**

Yihong Tong<sup>a, b, c</sup>, Hongyuan Xu<sup>a, b, c</sup>, Ting Li<sup>a</sup>, Zhao Kong<sup>a, b, c</sup>, Jiawei Li<sup>a, b, c</sup>, Qi Hua Fan<sup>d</sup>, Hui

Xu<sup>\*a</sup> and Hong Jin<sup>\*a</sup>, Keliang Wang<sup>\*c</sup>

*<sup>a</sup> Suzhou Academy, Xi'an Jiaotong University, Suzhou, Jiangsu 215123, China*

*<sup>b</sup> Nano Science and Technology Institute, University of Science and Technology of China, Suzhou, Jiangsu 215123, China*

*<sup>c</sup> Suzhou Institute for Advanced Research, University of Science and Technology of China, Suzhou, Jiangsu 215123, China*

*<sup>d</sup> Department of Electrical Engineering and Computer Engineering and Department of Chemical Engineering and Materials Science,*

*Michigan State University, East Lansing, Michigan 48824, United States*

*<sup>e</sup> Fraunhofer USA, Inc., Center Midwest, Division for Coatings and Diamond Technologies, Michigan State University, East Lansing, MI*

*48824, USA*

Corresponding Emails: [xhxuhui@xjtu.edu.cn](mailto:xhxuhui@xjtu.edu.cn) (H. Xu), [jhjinhong@xjtu.edu.cn](mailto:jhjinhong@xjtu.edu.cn) (H. Jin),  
[klwang@msu.edu](mailto:klwang@msu.edu) (K. Wang)

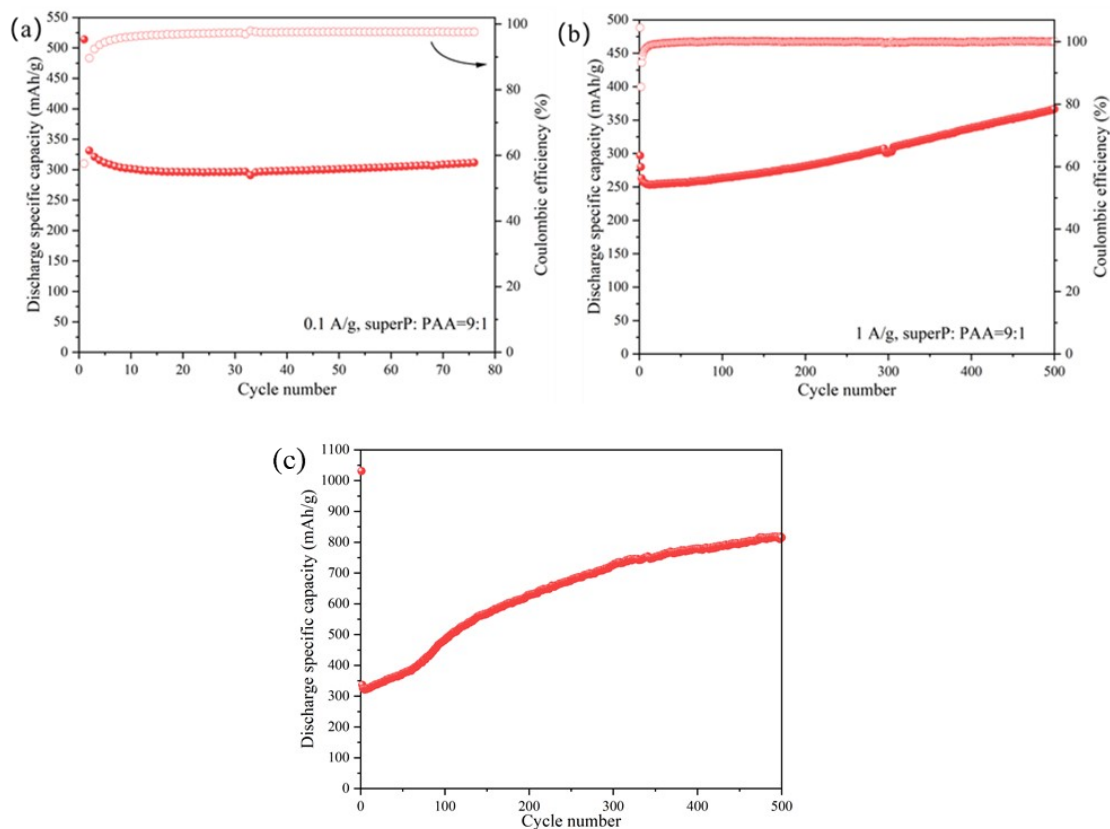

Fig. S1. Long-term cyclic performance of superP electrode (superP: PAA=9:1, the mass loading of super P is around  $0.6 \text{ mg} \cdot \text{cm}^{-2}$ , 0.01-3.0 V). (a) 0.1 A/g, (b) 1 A/g. The contribution of carbon to the capacity was assessed and carbon for improved conductivity also contributes some capacity during cycling (about 120 mA h/g at 0.1 A/g, 100-148 mA h/g at 1 A/g). (c) Corrected long-term cyclic performance of FACM at 1 A/g. Contribution of conductive carbon materials has been subtracted (based on cyclic performance of pure super P, Fig. S1b).

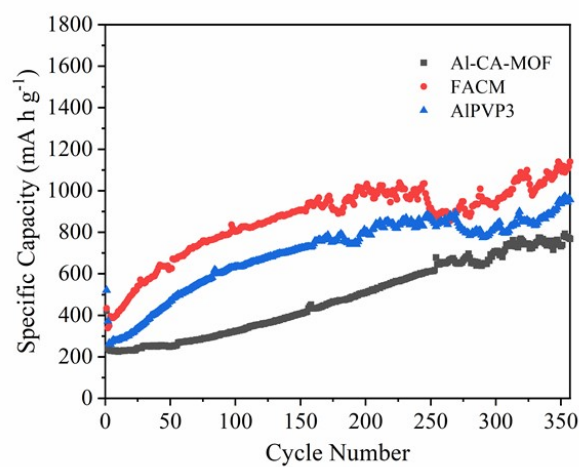

Fig. S2. Cycling performance of the Al-CA-MOF, FACM and AIPVP3 (indicate the product of adding 0 g, 1.5 g and 3g PVP, respectively)

Table. S1. Comparison of electrochemical performance of Al-MOF-based anodes.

| Materials                 | Current density | Capacity                     | literature |
|---------------------------|-----------------|------------------------------|------------|
| Al-FumAs                  | 0.0375 A/g      | 392 mA h/g after 100 cycles  | 1          |
| Al-MOF/graphene composite | 0.1 A/g         | 403 mA h/g after 100 cycles  | 2          |
|                           | 0.5 A/g         | 484 mA h/g after 1000 cycles |            |
|                           | 0.8 A/g         | 284 mA h/g after 1000 cycles |            |
|                           | 1.0 A/g         | 267 mA h/g after 1000 cycles |            |
|                           | 2.0 A/g         | 153 mA h/g after 1000 cycles |            |
| FACM                      | 0.1 A/g         | 1103 mA h/g after 350 cycles | Our work   |
|                           | 0.5 A/g         | 995 mA h/g after 500 cycles  |            |
|                           | 1.0 A/g         | 962 mA h/g after 500 cycles  |            |
|                           | 2.0 A/g         | 799 mA h/g after 500 cycles  |            |
|                           | 5.0 A/g         | 610 mA h/g after 500cycles   |            |

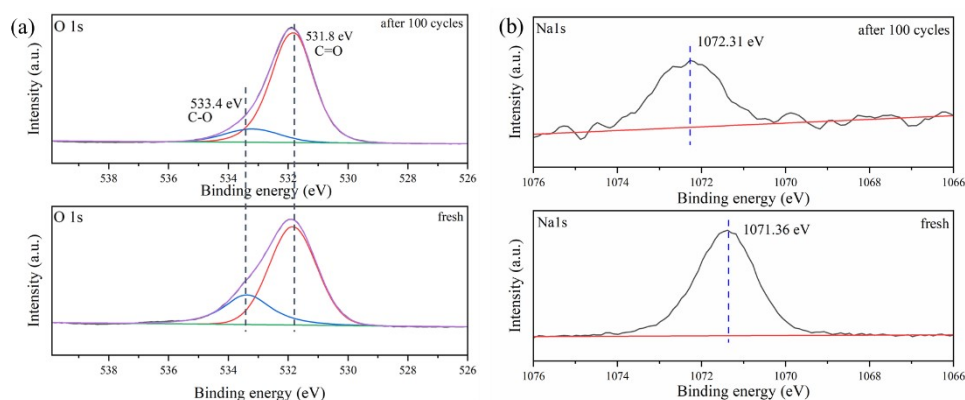

Fig S3. XPS measurement spectrum of FACM electrode before and after cycling. (a) O 1s and (b) Na 1s.

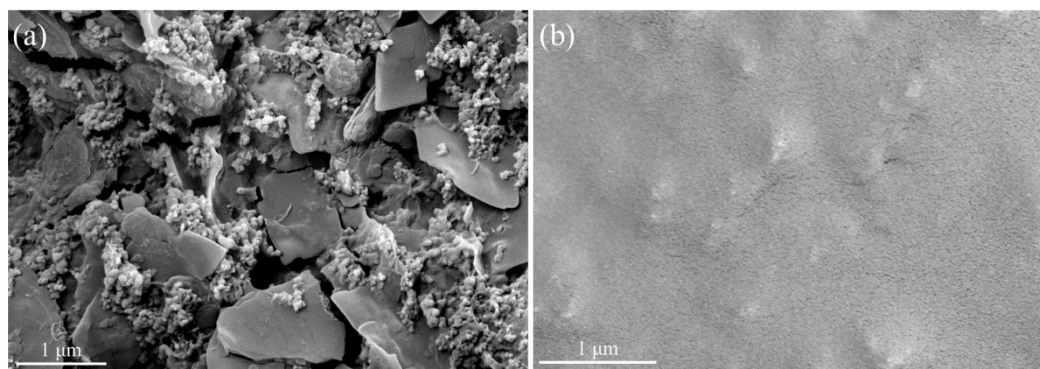

Fig S4. SEM images of the fresh electrode (a) and after 100 cycles electrode (b).

$$D_{Li^+} = \frac{R^2 T^2}{2A^2 n^4 F^4 C_{Li^+}^2 \sigma^2} \quad 1-1$$

$$Z' = \sigma \omega^{-1/2} \quad 1-2$$

Equ. 1-1 and 1-2. The formula for calculating the diffusion coefficient of lithium ions.

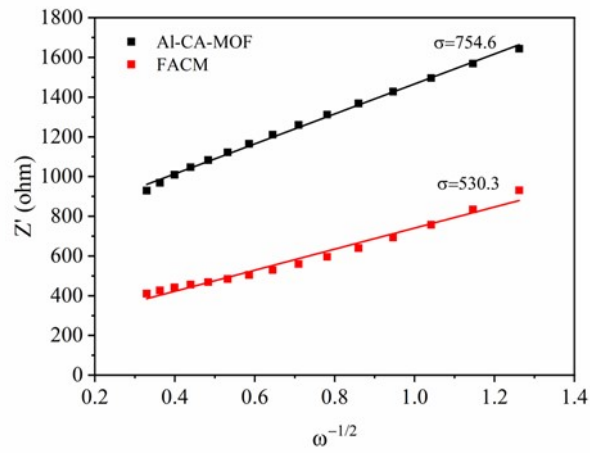

Fig. S5. The connection between  $Z'$  and  $\omega^{-1/2}$

1. Y. Wang, Q. Qu, G. Liu, V. S. Battaglia and H. Zheng, *Nano Energy*, 2017, **39**, 200-210.
2. C. Gao, P. Wang, Z. Wang, S. K. Kaer, Y. Zhang and Y. Yue, *Nano Energy*, 2019, **65**.
